# Supplementary material for: SARS-CoV-2 B.1.1.7 (alpha) and B.1.351 (beta) variants induce pathogenic patterns in K18-hACE2 transgenic mice distinct from early strains
Source: PubMed Central journal article supplement (PMC8589842; doi:10.1038/s41467-021-26803-w), 2021-11-12
Supplement: 41467_2021_26803_MOESM1_ESM.pdf [file 41467_2021_26803_MOESM1_ESM.pdf]

# Supplementary Information

## **SARS-CoV-2 B.1.1.7 (alpha) and B.1.351 (beta) variants induce pathogenic patterns in K18-hACE2 transgenic mice distinct from early strains**

**Peter Radvak<sup>1,5</sup>, Hyung Joon Kwon<sup>1,5</sup>, Martina Kosikova<sup>1,5</sup>, Uriel Ortega-Rodriguez<sup>1,5</sup>, Ruoxuan Xiang<sup>2</sup>, Je-Nie Phue<sup>3</sup>, Rong-Fong Shen<sup>3</sup>, James Rozzelle<sup>4</sup>, Neeraj Kapoor<sup>4</sup>, Taylor Rabara<sup>4</sup>, Jeff Fairman<sup>4</sup>, Hang Xie<sup>1\*</sup>**

<sup>1</sup>Laboratory of Pediatric and Respiratory Viral Diseases, Division of Viral Products, Office of Vaccines Research and Review, <sup>2</sup>Division of Biostatistics, Office of Biostatistics and Epidemiology, <sup>3</sup>Facility for Biotechnology Resources, Center for Biologics Evaluation and Research, United States Food and Drug Administration, Silver Spring, Maryland, USA; <sup>4</sup>Vaxcyte, Inc., Foster City, California, USA.

<sup>5</sup>These authors contributed equally: Peter Radvak, Hyung Joon Kwon, Martina Kosikova, Uriel Ortega-Rodriguez.

\*Corresponding author: Hang Xie (Email: [Hang.Xie@fda.hhs.gov](mailto:Hang.Xie@fda.hhs.gov))

### **Supplementary information includes:**

- Six supplementary figures.
- One supplementary table.

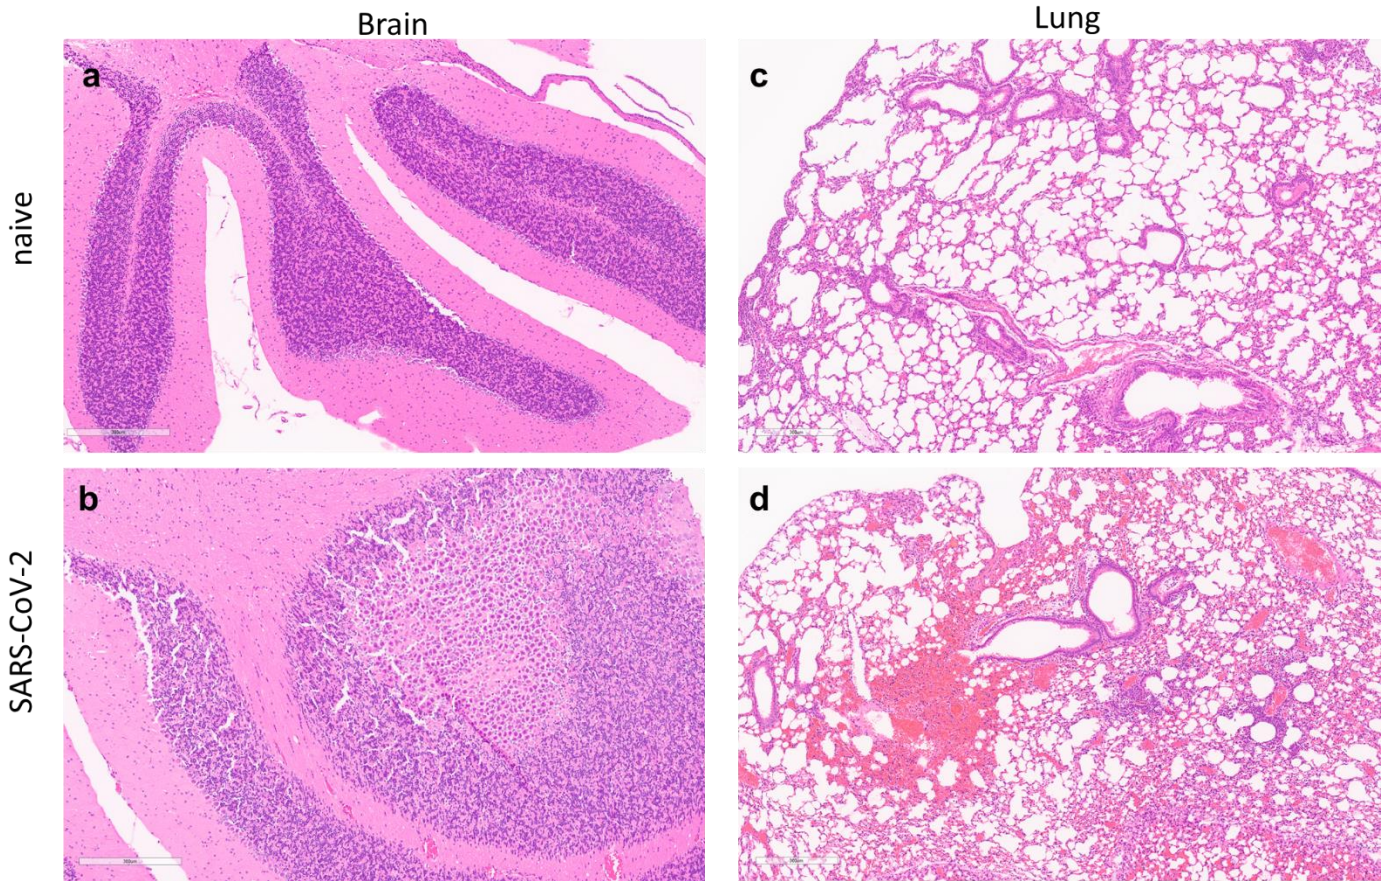

1

2 **Supplementary Figure 1. Histopathology of lung and brain of K18-hACE2 mice after SARS-CoV-2**  
3 **infection.** Lungs and brains were harvested from K18-hACE2 mice at day 6 post infection (dpi 6) of hCoV-  
4 19/South Africa/KRISP-EC-K005321/2020 (SA) of lineage B.1.351 ( $10^2$  TCID<sub>50</sub>/mouse). Representative  
5 images of hematoxylin and eosin staining of lung (a & b) and brain (c & d) tissues from naïve or infected  
6 K18-hACE2 mice (n=6 mice/group) are shown. Scale bars, 300  $\mu$ m.

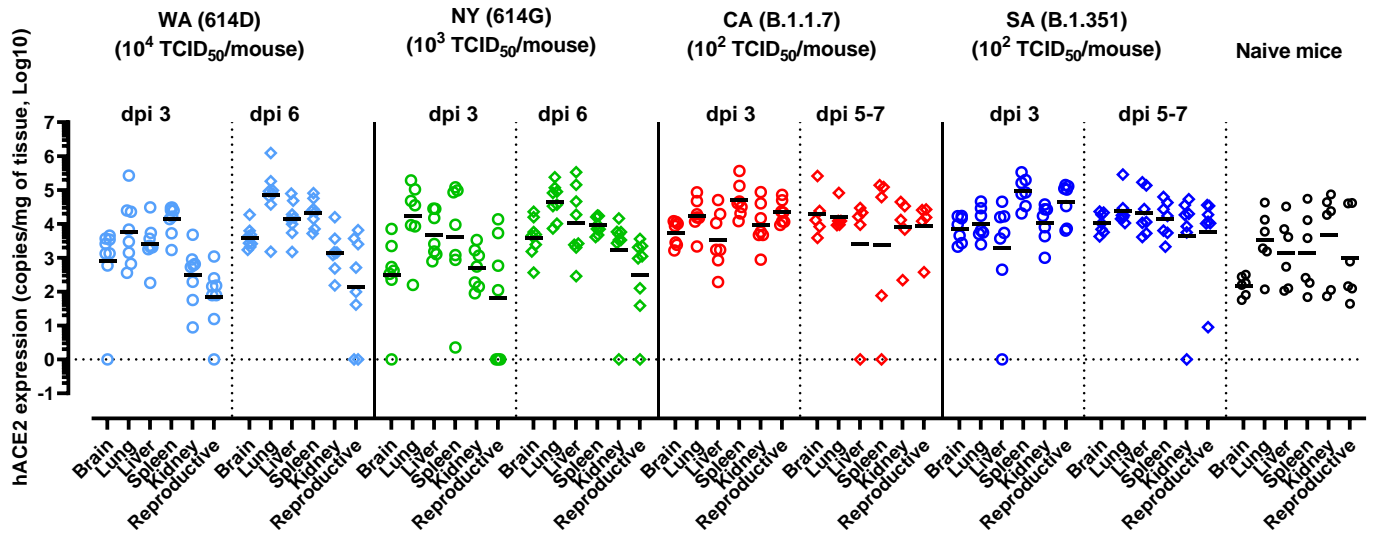

1

2 **Supplementary Figure 2. hACE2 expression in various organs of K18-hACE2 mice after infections of**  
 3 **SARS-CoV-2 and variants.** K18-hACE2 mice of both sexes (approximately 1:1 ratio) were infected  
 4 intranasally with USA-WA1/2020 (WA) of lineage A bearing 614D ( $10^4$  TCID<sub>50</sub>/mouse), New York-  
 5 PV09158/2020 (NY) of lineage B.1.3 bearing 614G ( $10^3$  TCID<sub>50</sub>/mouse), USA/CA\_CDC\_5574/2020 (CA)  
 6 of lineage B.1.1.7 ( $10^2$  TCID<sub>50</sub>/mouse) or hCoV-19/South Africa/KRISP-EC-K005321/2020 (SA) of lineage  
 7 B.1.351 ( $10^2$  TCID<sub>50</sub>/mouse). hACE2 expression in brain, lung, liver, spleen, kidney, and reproductive  
 8 organs (ovary or seminal vesicles) at indicated days post infection (dpi) were measured by RT-qPCR. Data  
 9 are expressed as mean  $\pm$  s.e.m of 5-8 mice/time point/group. Short lines represent geometric means and  
 10 dotted horizontal line indicates the limit of detection.

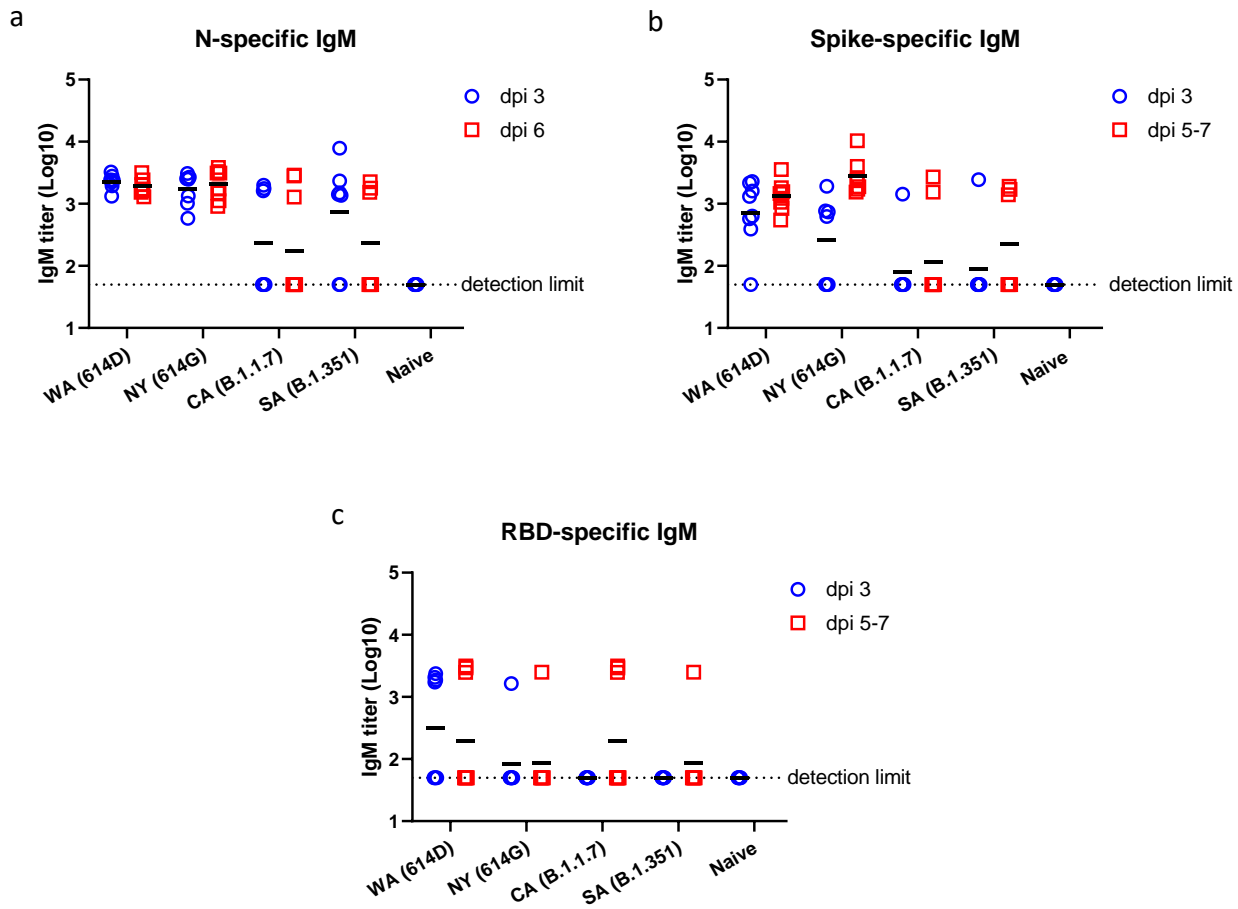

1

2 **Supplementary Figure 3. Detection of virus-specific IgM in K18-hACE2 after infections of SARS-**  
 3 **CoV-2 and variants.** K18-hACE2 mice of both sexes (approximately 1:1 ratio) were infected intranasally  
 4 with USA-WA1/2020 (WA) of lineage A bearing 614D ( $10^4$  TCID<sub>50</sub>/mouse), New York-PV09158/2020  
 5 (NY) of lineage B.1.3 bearing 614G ( $10^3$  TCID<sub>50</sub>/mouse), USA/CA\_CDC\_5574/2020 (CA) of lineage  
 6 B.1.1.7 ( $10^2$  TCID<sub>50</sub>/mouse) or hCoV-19/South Africa/KRISP-EC-K005321/2020 (SA) of lineage B.1.351  
 7 ( $10^2$  TCID<sub>50</sub>/mouse). Sera were collected at indicated days post infection (dpi) for IgM ELISA titers specific  
 8 for SARS-CoV-2 (a) nucleocapsid (N), (b) spike, or (c) receptor binding domain (RBD). Short lines  
 9 represent geometric means of 6-9 mice/time point/group and dotted horizontal lines indicate the limit of  
 10 detection.

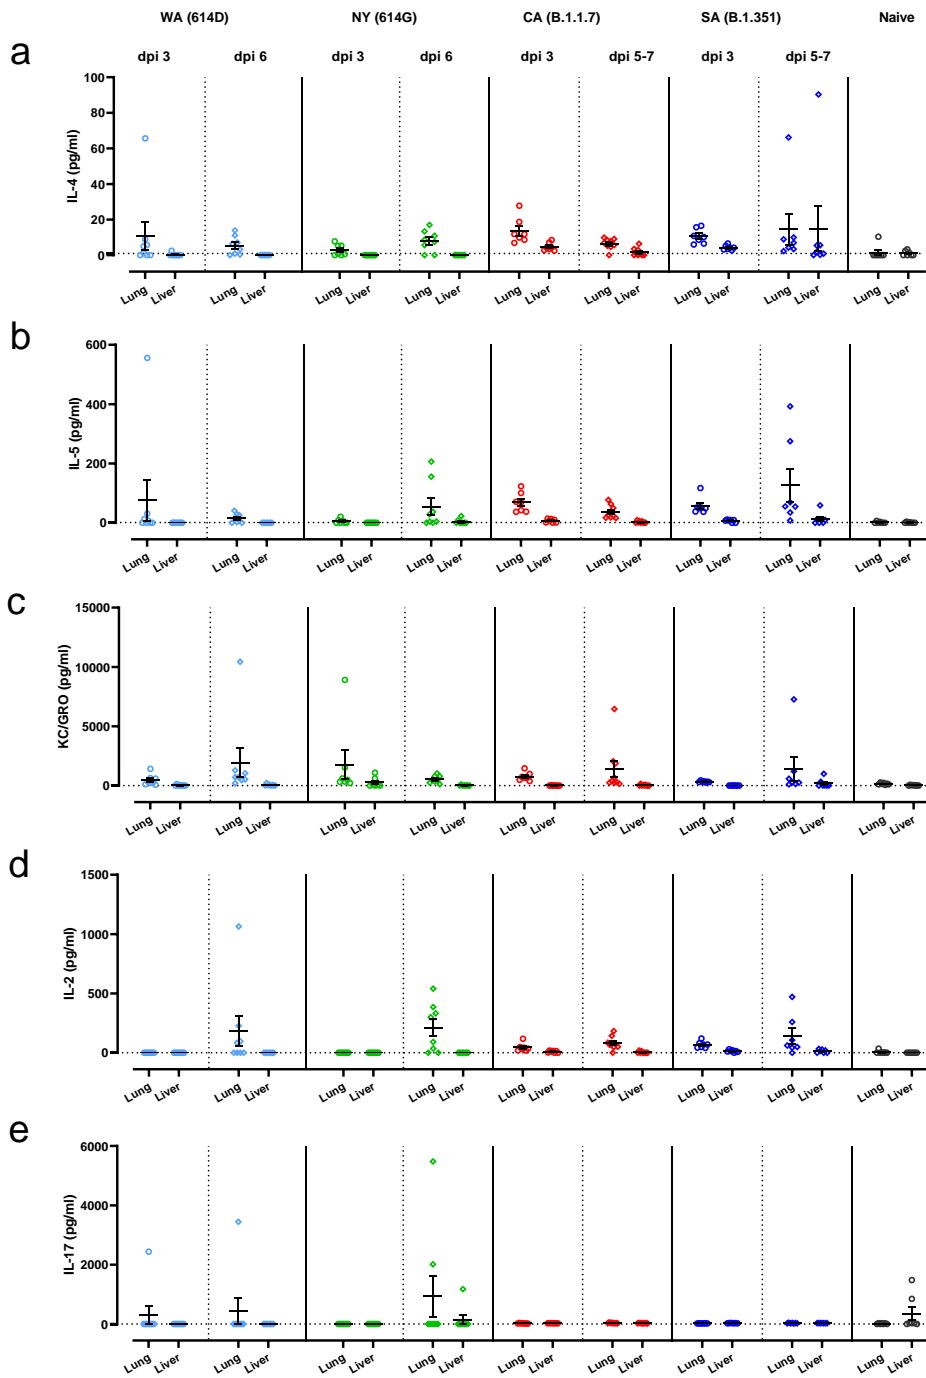

1

2 **Supplementary Figure 4. Additional proinflammatory cytokines induced by infections of SARS-CoV-2**  
 3 **or variants.** K18-hACE2 mice of both sexes (approximately 1:1 ratio) were infected intranasally with USA-  
 4 WA1/2020 (WA) of lineage A bearing 614D, New York-PV09158/2020 (NY) of lineage B.1.3 bearing  
 5 614G, USA/CA\_CDC\_5574/2020 (CA) of lineage B.1.1.7 or hCoV-19/South Africa/KRISP-EC-  
 6 K005321/2020 (SA) of lineage B.1.351 at indicated doses in an ABSL-3 biocontainment. Additional mouse  
 7 cytokines in lung and liver homogenates harvested at indicated days post infection (dpi) were measured  
 8 (n=7-9 mice/time point/group), including (a) IL-4; (b) IL-5; (c) KC/GRO; (d) IL-2; and (e) IL-17. Mean ±  
 9 s.e.m are shown and dotted horizontal lines indicate the limit of detection.

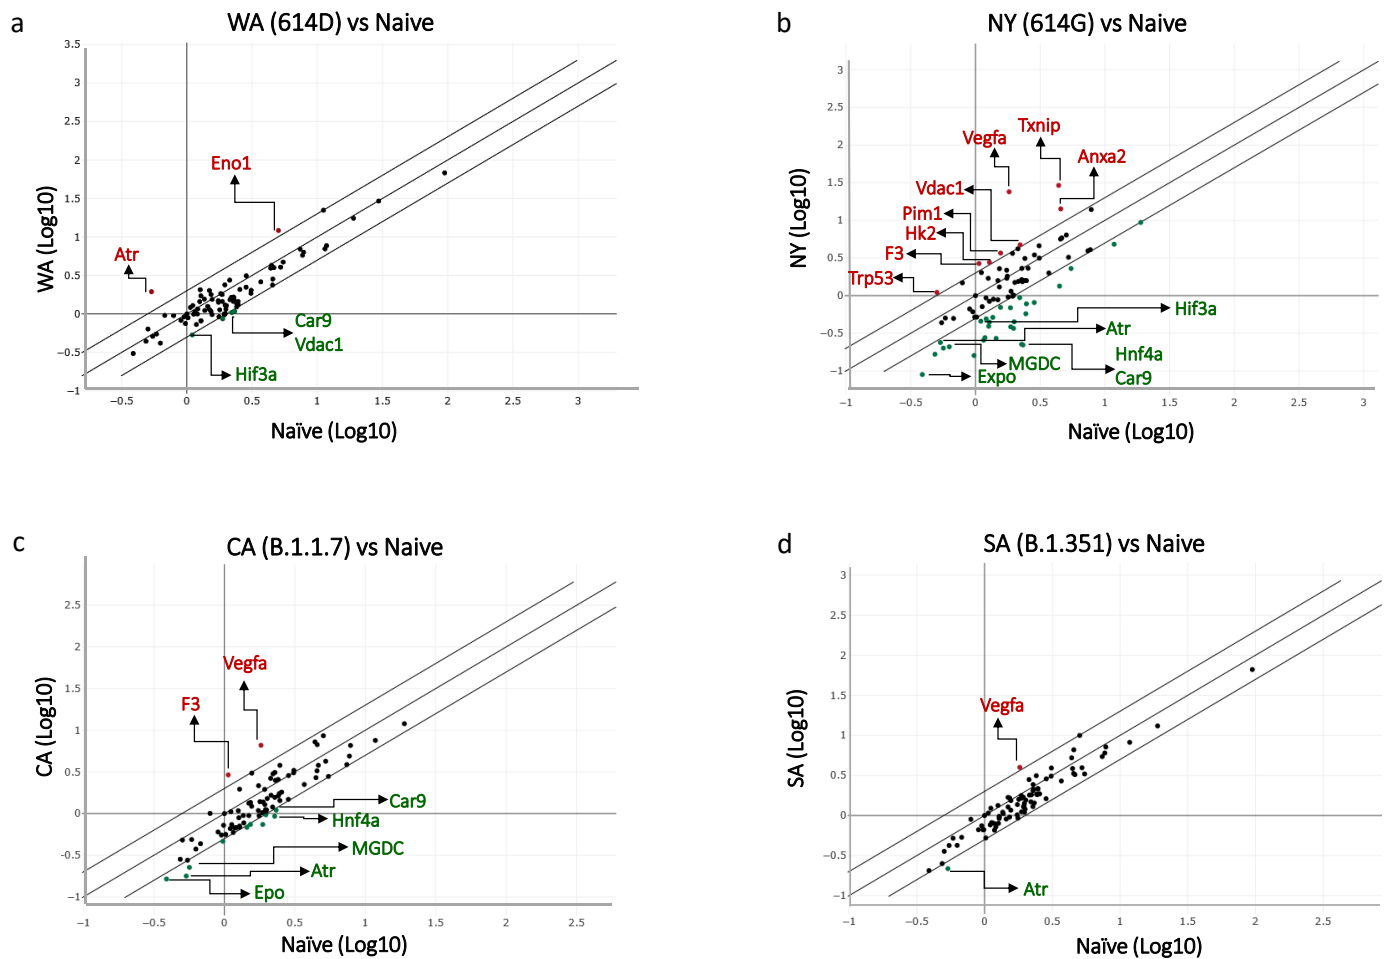

1

2 **Supplementary Figure 5. The correlation scatter plot of pulmonary gene expression of hypoxia**  
 3 **signaling pathway after SARS-CoV-2 infections.** K18-hACE2 mice of both sexes (approximately 1:1  
 4 ratio) were infected intranasally with USA-WA1/2020 (WA) of lineage A bearing 614D ( $10^4$   
 5  $TCID_{50}/mouse$ ), New York-PV09158/2020 (NY) of lineage B.1.3 bearing 614G ( $10^3$   $TCID_{50}/mouse$ ),  
 6 USA/CA\_CDC\_5574/2020 (CA) of lineage B.1.1.7 ( $10^2$   $TCID_{50}/mouse$ ) or hCoV-19/South Africa/KRISP-  
 7 EC-K005321/2020 (SA) of lineage B.1.351 ( $10^2$   $TCID_{50}/mouse$ ). Hypoxia signaling pathway PCR array was  
 8 performed using RNA extracted from lung homogenates of naïve or infected mice at day 3 post infection (n=  
 9 4-5 mice/group). The average fold changes of individual genes induced by SARS-CoV-2 infection, including  
 10 (a) WA (614D), (b) NY (614G), (c) CA (B.1.1.7) and (d) SA (B.1.351) vs naïve mice are presented in the  
 11 correlation scatter plots. Genes beyond the 2-fold change lines are marked by red (upregulation) or green  
 12 (downregulation) dots. Typical genes that involve in the hypoxia signaling pathway are labeled.

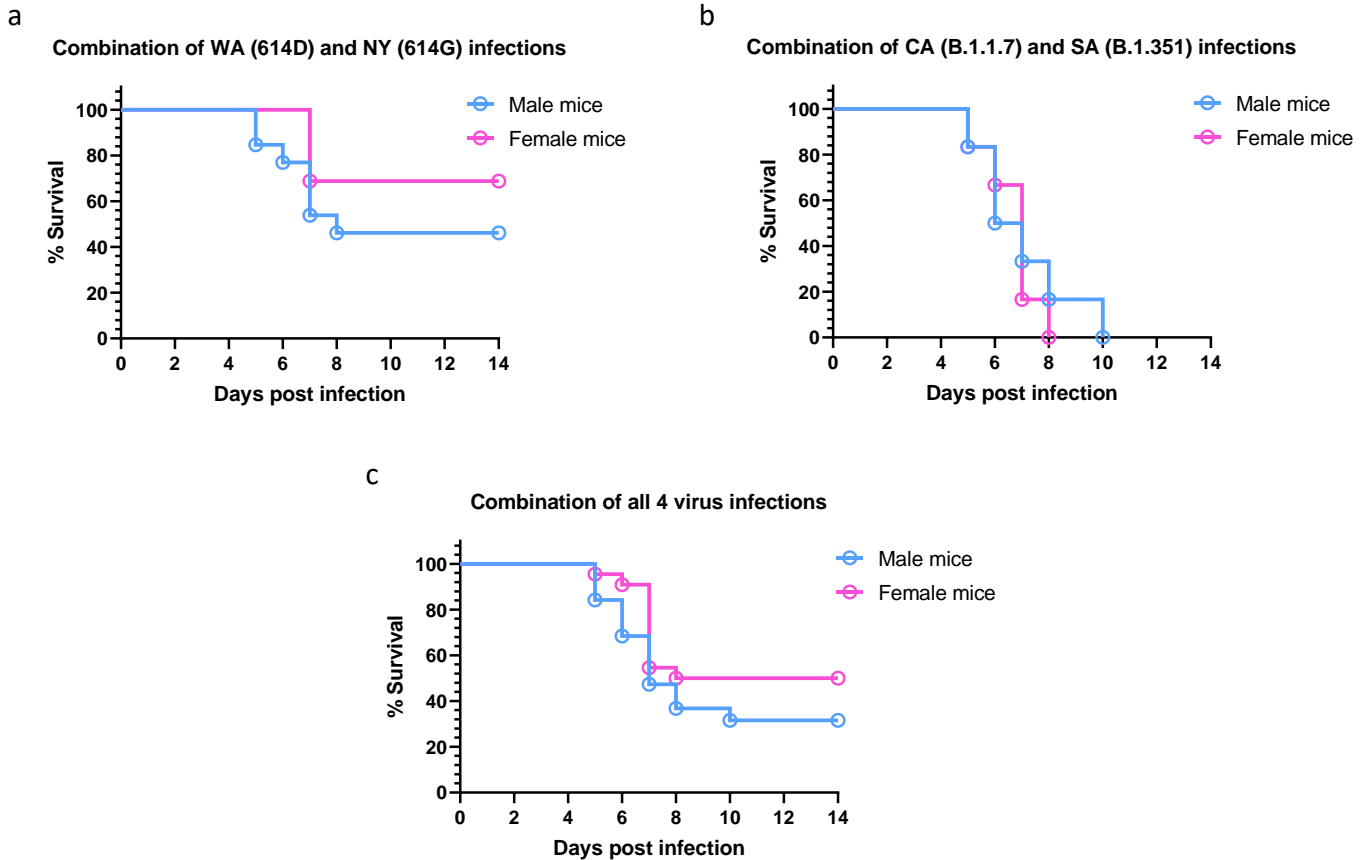

1  
 2 **Supplementary Figure 6. Sex-biased difference in the survivals of K18-hACE2 mice after SARS-CoV-**  
 3 **2 infections.** K18-hACE2 mice of both sexes (approximately 1:1 ratio) were infected intranasally with USA-  
 4 WA1/2020 (WA) of lineage A bearing 614D, New York-PV09158/2020 (NY) of lineage B.1.3 bearing  
 5 614G, USA/CA\_CDC\_5574/2020 (CA) of lineage B.1.1.7 or hCoV-19/South Africa/KRISP-EC-  
 6 K005321/2020 (SA) of lineage B.1.351 at indicated doses shown in Figure 1c. The % survivals of infected  
 7 mice shown in Figure 1c were reanalyzed according to the sexes. (a) the combined survival of female and  
 8 male mice after infection with WA (614D) or NY (614G) (n= 15-16 mice/sex/group); (b) the combined  
 9 survivals of female and male mice after infection with CA (B.1.1.7) or SA (B.1.351) (n=6 mice/sex/group);  
 10 (c) the combined survivals of all female and male mice after 4 virus infections (n= 21-22 mice/sex/group).

11  
 12  
 13  
 14  
 15  
 16  
 17  
 18

1 **Supplementary Table 1. Regulation of the hypoxia pathway transcriptional genes in the lungs of K18-hACE2**  
 2 **transgenic mice at day 3 post SARS-CoV-2 infection\*.**

| Gene<br>Symbol | WA (614D)   |          | NY (614G)   |          | CA (B.1.1.7) |          | SA (B.1.351) |          |
|----------------|-------------|----------|-------------|----------|--------------|----------|--------------|----------|
|                | Fold change | p value  | Fold change | p value  | Fold change  | p value  | Fold change  | p value  |
| Adm            | 0.77        | 0.269308 | 0.16        | 0.016381 | 0.48         | 0.122498 | 0.68         | 0.378990 |
| Adora2b        | 0.93        | 0.621161 | 0.22        | 0.023513 | 0.51         | 0.070354 | 0.70         | 0.174827 |
| Aldoa          | 0.81        | 0.401227 | 1.77        | 0.579180 | 0.84         | 0.474676 | 0.91         | 0.704539 |
| Angptl4        | 0.71        | 0.172278 | 0.72        | 0.096828 | 0.77         | 0.139424 | 0.84         | 0.278878 |
| Ankrd37        | 1.63        | 0.005757 | 0.31        | 0.010772 | 0.70         | 0.205102 | 0.63         | 0.138468 |
| Anxa2          | 0.62        | 0.337070 | 3.12        | 0.356016 | 1.48         | 0.915868 | 1.45         | 0.904911 |
| Apex1          | 0.78        | 0.295050 | 0.28        | 0.035834 | 0.52         | 0.141486 | 0.57         | 0.141873 |
| Arnt           | 0.82        | 0.321351 | 0.91        | 0.570315 | 0.71         | 0.240713 | 0.73         | 0.257010 |
| Atr            | 3.64        | 0.021031 | 0.45        | 0.377243 | 0.33         | 0.187373 | 0.41         | 0.198955 |
| Bhlhe40        | 0.94        | 0.869219 | 0.86        | 0.893131 | 0.84         | 0.270078 | 0.89         | 0.461663 |
| Blm            | 0.87        | 0.441187 | 0.19        | 0.020108 | 0.47         | 0.164501 | 0.63         | 0.161608 |
| Bnip3          | 0.86        | 0.455653 | 0.42        | 0.102522 | 0.51         | 0.141487 | 0.60         | 0.175286 |
| Bnip3l         | 0.94        | 0.562240 | 0.53        | 0.226751 | 0.52         | 0.173283 | 0.74         | 0.426029 |
| Btg1           | 1.10        | 0.912006 | 1.22        | 0.921141 | 1.00         | 0.714312 | 1.01         | 0.786513 |
| Car9           | 0.46        | 0.003799 | 0.10        | 0.001146 | 0.47         | 0.038216 | 0.62         | 0.218879 |
| Ccng2          | 0.75        | 0.183647 | 0.43        | 0.055550 | 0.55         | 0.096137 | 0.67         | 0.174187 |
| Cops5          | 0.87        | 0.489682 | 0.51        | 0.110915 | 0.55         | 0.114167 | 0.51         | 0.098959 |
| Ctsa           | 0.65        | 0.183054 | 1.01        | 0.760932 | 1.06         | 0.841752 | 1.26         | 0.634928 |
| Ddit4          | 0.52        | 0.113173 | 1.03        | 0.944726 | 0.53         | 0.159299 | 0.53         | 0.155666 |
| Dnajc5         | 0.66        | 0.215296 | 0.52        | 0.162531 | 0.54         | 0.159433 | 0.72         | 0.265252 |
| Edn1           | 0.91        | 0.488113 | 0.74        | 0.295416 | 0.67         | 0.195337 | 0.74         | 0.271400 |
| Egln1          | 1.16        | 0.779340 | 1.82        | 0.506844 | 0.95         | 0.573438 | 1.11         | 0.794826 |
| Egln2          | 0.64        | 0.111181 | 0.72        | 0.274135 | 0.69         | 0.225407 | 0.90         | 0.610598 |
| Egr1           | 0.73        | 0.315597 | 1.01        | 0.850701 | 1.37         | 0.534166 | 1.07         | 0.867169 |
| Eif4ebp1       | 0.96        | 0.714405 | 0.41        | 0.078320 | 0.56         | 0.065642 | 0.60         | 0.074379 |
| Eno1           | 2.41        | 0.791075 | 1.27        | 0.297333 | 1.71         | 0.442002 | 1.98         | 0.524637 |
| Epo            | 0.79        | 0.277921 | 0.23        | 0.043037 | 0.42         | 0.105921 | 0.53         | 0.138256 |
| Ero1l          | 1.15        | 0.816237 | 1.35        | 0.423492 | 0.86         | 0.434190 | 1.06         | 0.959584 |
| F10            | 0.96        | 0.517411 | 0.53        | 0.142132 | 0.73         | 0.258602 | 0.67         | 0.219893 |
| F3             | 1.14        | 0.933498 | 2.51        | 0.143504 | 2.74         | 0.138802 | 1.01         | 0.712684 |
| Fos            | 0.53        | 0.153161 | 0.64        | 0.485989 | 1.53         | 0.489565 | 0.86         | 0.486594 |
| Gbe1           | 0.83        | 0.435986 | 0.78        | 0.427685 | 0.56         | 0.252594 | 0.65         | 0.310389 |
| Gpi1           | 0.52        | 0.133429 | 1.24        | 0.977516 | 0.72         | 0.336094 | 0.74         | 0.607497 |
| Gys1           | 0.54        | 0.088784 | 0.23        | 0.014333 | 0.71         | 0.330067 | 0.74         | 0.487989 |
| Hif1a          | 1.35        | 0.807847 | 0.59        | 0.359503 | 0.64         | 0.342271 | 0.86         | 0.572808 |
| Hif1an         | 0.96        | 0.642490 | 0.64        | 0.150803 | 0.58         | 0.117256 | 0.78         | 0.336065 |
| Hif3a          | 0.49        | 0.001406 | 0.42        | 0.003423 | 0.60         | 0.212977 | 0.69         | 0.634791 |
| Hk2            | 0.63        | 0.114526 | 2.17        | 0.251354 | 1.53         | 0.278265 | 0.74         | 0.296431 |
| Hmox1          | 0.88        | 0.391368 | 0.63        | 0.208015 | 0.65         | 0.258955 | 0.72         | 0.242833 |
| Hnf4a          | 0.65        | 0.040780 | 0.10        | 0.000853 | 0.41         | 0.037066 | 0.57         | 0.017748 |
| Ier3           | 0.68        | 0.132246 | 0.67        | 0.196062 | 1.09         | 0.929228 | 0.92         | 0.732974 |
| Igfbp3         | 1.22        | 0.427641 | 0.51        | 0.053710 | 0.57         | 0.093931 | 0.67         | 0.129406 |
| Jmjd6          | 0.63        | 0.029778 | 0.54        | 0.021902 | 0.78         | 0.466171 | 0.89         | 0.662104 |
| Ldha           | 0.92        | 0.542851 | 0.50        | 0.057768 | 0.63         | 0.154154 | 0.69         | 0.155281 |
| Lgals3         | 0.81        | 0.321213 | 0.97        | 0.780335 | 1.24         | 0.780455 | 0.78         | 0.367502 |
| Lox            | 0.85        | 0.417355 | 1.25        | 0.678904 | 0.62         | 0.235886 | 0.59         | 0.211033 |
| Map3k1         | 1.41        | 0.723241 | 0.74        | 0.506460 | 0.64         | 0.281945 | 0.79         | 0.409669 |
| Met            | 0.78        | 0.305263 | 0.21        | 0.042116 | 0.40         | 0.108406 | 0.59         | 0.189817 |
| Mif            | 0.65        | 0.063105 | 0.41        | 0.022440 | 0.64         | 0.133491 | 0.70         | 0.135786 |
| Mmp9           | 0.59        | 0.097565 | 0.31        | 0.104277 | 0.58         | 0.194994 | 0.88         | 0.513771 |
| Mxi1           | 0.81        | 0.357518 | 0.65        | 0.225659 | 0.56         | 0.162466 | 0.77         | 0.370764 |
| Nampt          | 1.29        | 0.562521 | 1.97        | 0.091137 | 1.24         | 0.653509 | 1.32         | 0.519812 |
| Ncoa1          | 1.34        | 0.141190 | 0.66        | 0.044033 | 0.53         | 0.018609 | 0.76         | 0.102682 |
| Ndrp1          | 0.71        | 0.173677 | 0.85        | 0.617098 | 0.48         | 0.079650 | 0.63         | 0.151920 |
| Nfkb1          | 0.77        | 0.358910 | 1.06        | 0.805571 | 0.90         | 0.533435 | 1.13         | 0.906420 |
| Nos3           | 0.64        | 0.174918 | 0.35        | 0.067778 | 0.55         | 0.186433 | 0.72         | 0.364739 |
| Odc1           | 0.77        | 0.311241 | 0.62        | 0.373522 | 0.81         | 0.415789 | 0.75         | 0.369219 |
| P4ha1          | 1.17        | 0.065483 | 1.49        | 0.131666 | 0.89         | 0.233690 | 1.08         | 0.525909 |
| P4hb           | 0.51        | 0.198874 | 1.30        | 0.900770 | 1.07         | 0.738565 | 1.30         | 0.804818 |



|          |      |          |       |          |      |          |      |          |
|----------|------|----------|-------|----------|------|----------|------|----------|
| Pdk1     | 1.15 | 0.901620 | 0.38  | 0.104645 | 0.70 | 0.345338 | 0.81 | 0.541256 |
| Per1     | 0.52 | 0.045221 | 1.89  | 0.130082 | 1.01 | 0.851469 | 0.88 | 0.468096 |
| Pfkfb3   | 0.62 | 0.182294 | 0.23  | 0.067607 | 0.57 | 0.230130 | 0.55 | 0.175394 |
| Pfkfb4   | 0.50 | 0.031108 | 0.51  | 0.047339 | 0.66 | 0.190313 | 0.67 | 0.135363 |
| Pfkl     | 0.64 | 0.110442 | 0.74  | 0.220654 | 0.75 | 0.258039 | 0.77 | 0.257403 |
| Pfkp     | 0.55 | 0.334647 | 0.66  | 0.310140 | 0.68 | 0.320868 | 0.77 | 0.407603 |
| Pgam1    | 0.75 | 0.231790 | 0.53  | 0.125501 | 0.64 | 0.214433 | 0.78 | 0.345939 |
| Pgf      | 0.51 | 0.120932 | 0.19  | 0.070372 | 0.49 | 0.168395 | 0.56 | 0.236237 |
| Pgk1     | 0.86 | 0.428425 | 1.26  | 0.661193 | 0.82 | 0.417633 | 0.70 | 0.275430 |
| Pim1     | 0.99 | 0.856567 | 2.35  | 0.034723 | 1.96 | 0.097982 | 0.98 | 0.820961 |
| Pkm      | 0.60 | 0.220874 | 1.48  | 0.662689 | 0.99 | 0.737554 | 1.00 | 0.818175 |
| Plau     | 0.91 | 0.494848 | 0.34  | 0.034250 | 0.58 | 0.093728 | 0.52 | 0.071724 |
| Rbpj     | 0.96 | 0.629616 | 0.30  | 0.065947 | 0.60 | 0.172620 | 0.86 | 0.474724 |
| Ruvbl2   | 0.46 | 0.012554 | 0.61  | 0.048695 | 0.73 | 0.213056 | 0.88 | 0.401681 |
| Serpine1 | 1.20 | 0.681532 | 1.87  | 0.137648 | 1.27 | 0.572249 | 1.13 | 0.906491 |
| Slc16a3  | 0.58 | 0.046063 | 0.23  | 0.011951 | 0.56 | 0.077815 | 0.60 | 0.126919 |
| Slc2a1   | 0.63 | 0.069858 | 0.45  | 0.041675 | 0.78 | 0.352314 | 0.75 | 0.213201 |
| Slc2a3   | 0.67 | 0.214005 | 0.33  | 0.124332 | 0.60 | 0.216171 | 0.68 | 0.306115 |
| Tfrc     | 0.96 | 0.602276 | 0.37  | 0.039797 | 0.55 | 0.102970 | 0.95 | 0.665389 |
| Tpi1     | 0.71 | 0.122356 | 0.54  | 0.056810 | 0.61 | 0.087930 | 0.73 | 0.188019 |
| Trp53    | 1.27 | 0.765312 | 2.20  | 0.115682 | 0.96 | 0.664814 | 0.71 | 0.305228 |
| Txnip    | 0.90 | 0.510364 | 6.63  | 0.041210 | 1.65 | 0.653311 | 1.20 | 0.953711 |
| Usf2     | 0.94 | 0.493867 | 0.80  | 0.767696 | 0.50 | 0.141499 | 0.77 | 0.475304 |
| Vdac1    | 0.47 | 0.154186 | 2.14  | 0.219265 | 1.36 | 0.717820 | 0.82 | 0.449406 |
| Vegfa    | 1.01 | 0.617330 | 13.18 | 0.018136 | 3.63 | 0.169917 | 2.20 | 0.039536 |
| Actb     | 0.99 | 0.512510 | 4.08  | 0.269820 | 1.78 | 0.999793 | 1.54 | 0.764659 |
| B2m      | 2.00 | 0.764139 | 9.03  | 0.049525 | 6.29 | 0.118950 | 5.12 | 0.220735 |
| Gapdh    | 0.72 | 0.174689 | 0.18  | 0.025330 | 0.57 | 0.184862 | 0.70 | 0.236111 |
| Gusb     | 1.00 | 0.393781 | 1.00  | 0.450779 | 1.00 | 0.934536 | 1.00 | 0.307071 |
| Hsp90ab1 | 0.61 | 0.292158 | 3.29  | 0.197661 | 1.14 | 0.694994 | 1.11 | 0.886919 |

1 \* Lung homogenates of K18-hACE2 mice (n=4-5 mice/group) at day 3 post infection of USA-WA1/2020 (WA) of lineage A bearing  
2 614D (10<sup>4</sup> TCID<sub>50</sub>/mouse), New York-PV09158/2020 (NY) of lineage B.1.3 bearing 614G (10<sup>3</sup> TCID<sub>50</sub>/mouse),  
3 USA/CA\_CDC\_5574/2020 (CA) of lineage B.1.1.7 (10<sup>2</sup> TCID<sub>50</sub>/mouse) or hCoV-19/South Africa/KRISP-EC-K005321/2020 (SA) of  
4 lineage B.1.351 (10<sup>2</sup> TCID<sub>50</sub>/mouse) were subjected to the Hypoxia signaling pathway PCR array. Fold changes of individual genes  
5 over naïve mice are reported.

6
